# Supplementary material
Source: PubMed Central journal article supplement (PMC2689833)
Supplement: 91013.2008_1.pdf [file 91013.2008_1.pdf]

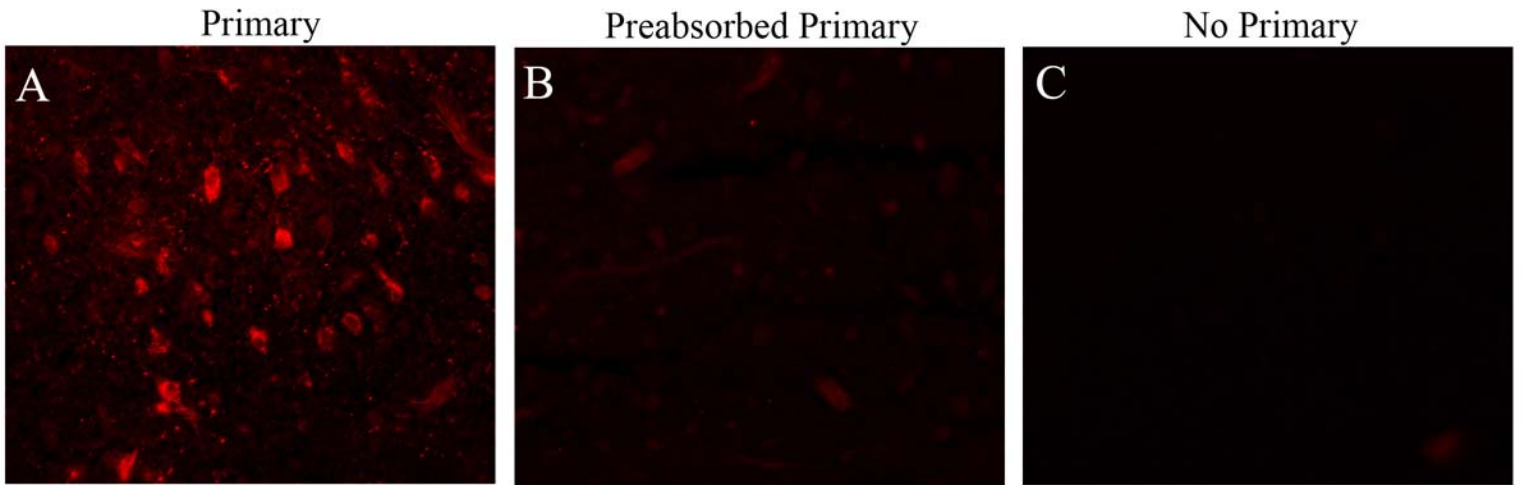

**Supplemental Figure 1.** CRF-immunoreactive neurons in Barrington's nucleus sections. A) Section incubated in CRF antibody (1:2000, Wylie Vale, Salk Institute). B) Section incubated with antibody preabsorbed with rat CRF (1 mg/ml). C) Section incubated without primary antibody. All sections were processed at the same time using the same buffers and secondary antibody and were photographed at the same exposure.
